# Supplementary material
Source: publisher figshare collection journal article supplement (https://karger.figshare.com/ndownloader/files/35902907)

**Supplementary Figure 3:** Accumulation of CD8+ cells in IBC tissues according to tumour grades.


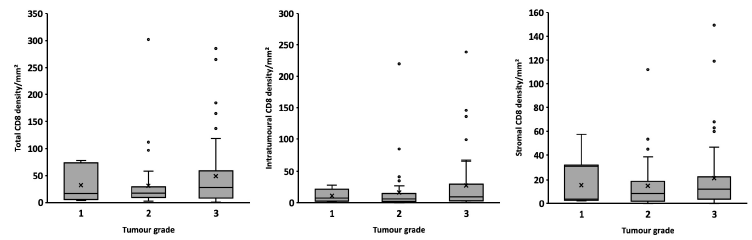

Supplement: Supplementary file 1 [file 35902907]
